# Supplementary material for: Racial and ethnic variation in multigene panel testing in a cohort of BRCA1/2‐negative individuals who had genetic testing in a large urban comprehensive cancer center
Source: PubMed Central journal article supplement (PMC8921894; doi:10.1002/cam4.4541), 2022-01-17
Supplement: CAM4-11-1465-s001.pdf [file CAM4-11-1465-s001.pdf]

Supplemental Table 3: List of Gene Panel Tests

|                                         |
|-----------------------------------------|
| Comprehensive COLARISÆ                  |
| ColoNextÆ                               |
| OvaNextÆ                                |
| CancerNextÆ                             |
| PancNext                                |
| BROCA                                   |
| GYNplus                                 |
| RenalNext                               |
| Comprehensive Cancer Panel (Gene Dx)    |
| Comprehensive Lynch Gene Panel          |
| Hereditary Colon Cancer Panel           |
| ProstateNext                            |
| Invitae Breast and Gyn Panel            |
| Lynch Syndrome Panel                    |
| Invitae Common Cancer Panel             |
| Quest Panel                             |
| TumorNext                               |
| Invitae Pancreas Cancer Panel           |
| Quest MyVantage Cancer Panel            |
| Invitae Renal Panel                     |
| Expanded-CustomNext                     |
| Expanded-CancerNext                     |
| Invitae Multi Cancer Panel              |
| BreastNextÆ                             |
| BRCPlus                                 |
| myRisk                                  |
| High Risk Hereditary Breast Cancer      |
| Hereditary Breast Cancer Extended Panel |
| CustomNext                              |
| Counsyl Comprehensive Panel             |
| Invitae Familial GIST Panel             |
| Invitae PCC/PGL Panel                   |
| Invitae Breast STAT Panel               |
| Invitae Breast Cancer Panel             |
| CustomNext-Cancer                       |
