# Supplementary material for: Racial and ethnic variation in multigene panel testing in a cohort of BRCA1/2‐negative individuals who had genetic testing in a large urban comprehensive cancer center
Source: PubMed Central journal article supplement (PMC8921894; doi:10.1002/cam4.4541), 2022-01-17
Supplement: CAM4-11-1465-s002.pdf [file CAM4-11-1465-s002.pdf]

Supplemental Table 2:

| Gene   | p-value*   | Number of patients tested for each gene |      |           |          |      |       |  |
|--------|------------|-----------------------------------------|------|-----------|----------|------|-------|--|
|        |            | AA                                      | Arab | Ashkenazi | Hispanic | NHW  | Other |  |
| ATM    | 0.63269243 | 455                                     | 45   | 42        | 23       | 1430 | 73    |  |
| BARD1  | 0.52340535 | 383                                     | 37   | 32        | 19       | 1168 | 57    |  |
| BRIP1  | 0.58841279 | 437                                     | 44   | 40        | 23       | 1331 | 69    |  |
| CDH1   | 0.34116859 | 475                                     | 50   | 42        | 23       | 1485 | 76    |  |
| CHEK2  | 0.61932124 | 493                                     | 50   | 45        | 23       | 1508 | 78    |  |
| MSH6   | 0.08389936 | 308                                     | 32   | 33        | 15       | 1066 | 47    |  |
| MUTYH  | 0.02341501 | 422                                     | 39   | 37        | 20       | 1189 | 60    |  |
| MYH    | 0.02341501 | 422                                     | 39   | 37        | 20       | 1189 | 60    |  |
| NBN    | 0.45453736 | 386                                     | 37   | 32        | 19       | 1175 | 57    |  |
| NF1    | 0.3521172  | 379                                     | 36   | 32        | 19       | 1111 | 56    |  |
| PALB2  | 0.39397783 | 460                                     | 46   | 42        | 23       | 1460 | 74    |  |
| PMS2   | 0.06126527 | 367                                     | 40   | 41        | 19       | 1257 | 62    |  |
| PTEN   | 0.07475012 | 446                                     | 43   | 36        | 19       | 1343 | 65    |  |
| RAD50  | 0.05567213 | 406                                     | 39   | 35        | 19       | 1147 | 58    |  |
| RAD51C | 0.2208421  | 373                                     | 35   | 30        | 19       | 1094 | 54    |  |
| RAD51D | 0.06200092 | 405                                     | 38   | 34        | 19       | 1152 | 57    |  |
| TP53   | 0.11605256 | 412                                     | 41   | 32        | 18       | 1211 | 65    |  |
| MLH1   | 0.00629641 | 278                                     | 30   | 28        | 14       | 1016 | 45    |  |
| MSH2   | 0.00178225 | 273                                     | 29   | 28        | 14       | 1011 | 43    |  |

\*Chi-squared test testing difference in proportion of patients tested for each gene by race

|
