# Supplementary material for: Racial and ethnic variation in multigene panel testing in a cohort of BRCA1/2‐negative individuals who had genetic testing in a large urban comprehensive cancer center
Source: PubMed Central journal article supplement (PMC8921894; doi:10.1002/cam4.4541), 2022-01-17
Supplement: CAM4-11-1465-s003.pdf [file CAM4-11-1465-s003.pdf]

Supplemental Table 1:  
Demographic and Clinical Characteristics of Individuals who Underwent Panel Genetic Testing  
by Genetic Test Result

| Characteristic                 | No mutation/<br>benign<br>(n=1736) | %    | Pathogenic<br>(n=273) | %    | VUS<br>(n=424) | %    |      |
|--------------------------------|------------------------------------|------|-----------------------|------|----------------|------|------|
| <b>Age at testing</b>          |                                    |      |                       |      |                |      |      |
| <50                            | 704                                | 72.4 | 106                   | 10.9 | 162            | 16.7 |      |
| 50 or older                    | 995                                | 70.5 | 160                   | 11.3 | 257            | 18.2 |      |
| Unknown                        | 43                                 | 87.8 | 3                     | 6.1  | 3              | 6.1  |      |
| <b>Gender</b>                  |                                    |      |                       |      |                |      |      |
| Male                           | 234                                | 73.6 | 33                    | 10.4 | 51             | 16.0 |      |
| Female                         | 1499                               | 71.1 | 238                   | 11.3 | 372            | 17.6 |      |
| Unknown                        | 3                                  | 50.0 | 2                     | 33.3 | 1              | 16.7 |      |
| <b>Personal Cancer History</b> |                                    |      |                       |      |                |      |      |
| None                           | 678                                | 70.6 | 117                   | 12.2 | 166            | 17.3 |      |
| HBOC <sup>1</sup>              | 834                                | 72.7 | 98                    | 8.5  | 215            | 18.7 |      |
| Breast                         | 675                                | 73.0 | 78                    | 8.4  | 172            | 18.6 |      |
|                                | HR+/HER2-                          | 28   | 73.3                  | 5    | 8.2            | 6    | 18.5 |
|                                | HR+/HER2+                          | 71   | 76.3                  | 9    | 9.7            | 13   | 14.0 |
|                                | HR-/HER2+                          | 28   | 77.1.8                | 5    | 12.8           | 6    | 15.4 |
|                                | Triple Neg                         | 82   | 77.4                  | 12   | 11.3           | 12   | 11.3 |
|                                | HR+/HER2<br>unknown                | 210  | 67.5                  | 29   | 9.3            | 72   | 23.2 |
|                                | HR-/HER2<br>unknown                | 63   | 76.8                  | 6    | 7.3            | 13   | 15.9 |
| Breast <45 <sup>1</sup>        | 175                                | 79.2 | 16                    | 7.2  | 30             | 13.6 |      |
| Colon                          | 141                                | 69.8 | 36                    | 17.8 | 25             | 12.4 |      |
| Ovarian                        | 94                                 | 71.8 | 13                    | 9.9  | 24             | 18.3 |      |
| Endometrial                    | 74                                 | 68.5 | 18                    | 16.7 | 16             | 14.8 |      |
| Thyroid                        | 16                                 | 55.2 | 3                     | 10.3 | 10             | 34.5 |      |
| Renal                          | 15                                 | 78.9 | 2                     | 10.5 | 2              | 10.5 |      |

|                              |     |      |     |      |     |      |
|------------------------------|-----|------|-----|------|-----|------|
| Gastric                      | 14  | 70.0 | 3   | 15.0 | 3   | 15.0 |
| Skin                         | 19  | 61.3 | 5   | 16.1 | 7   | 22.6 |
| Pancreas                     | 39  | 73.6 | 1   | 1.9  | 13  | 24.5 |
| Bladder                      | 1   | 50.0 | 1   | 50.0 | 0   | 0    |
| Prostate                     | 28  | 71.8 | 3   | 7.7  | 8   | 20.5 |
| <b>Family Cancer History</b> |     |      |     |      |     |      |
| HBOC <sup>2</sup>            | 950 | 72.6 | 139 | 10.6 | 220 | 16.8 |
| Breast                       | 753 | 73.2 | 100 | 9.7  | 175 | 17.0 |
| Breast ca <age 50            | 333 | 72.7 | 44  | 9.6  | 81  | 17.7 |
| Ovarian Cancer               | 186 | 69.7 | 39  | 14.6 | 42  | 15.7 |

1. NHW – Non-Hispanic White
2. Cancers associated with hereditary breast and ovarian cancer syndrome including breast, ovarian, pancreatic, prostate and melanoma.
